# Supplementary material for: Syntheses, crystal structures and supramolecular topologies of nickel(II)–s/p/d10/NH4+ complexes derived from a compartmental ligand
Source: Royal Society of Chemistry journal article supplement (doi:10.1039/c1ra00144b), 2011-01-01
Supplement: c1ra00144b.pdf [file c1ra00144b.pdf]

## **Electronic Supplementary Information**

**For**

**Syntheses, crystal structures and supramolecular topologies of nickel(II)-s/p/d<sup>10</sup>/NH<sub>4</sub><sup>+</sup> complexes derived from a compartmental ligand**

**Sohini Sarkar and Sasankasekhar Mohanta\***

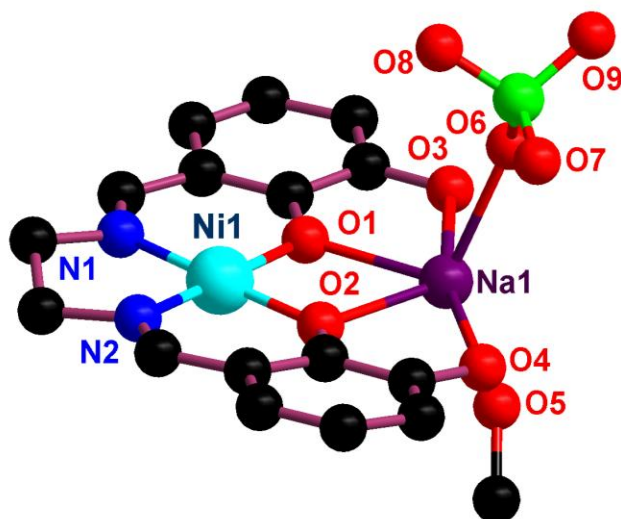

**Fig. S1** Crystal structure of  $[\text{Ni}^{\text{II}}\text{LnA}^{\text{I}}(\text{ClO}_4)(\text{CH}_3\text{OH})]$  (**2**). Hydrogen atoms and the ethoxy carbon atoms are not shown for clarity.

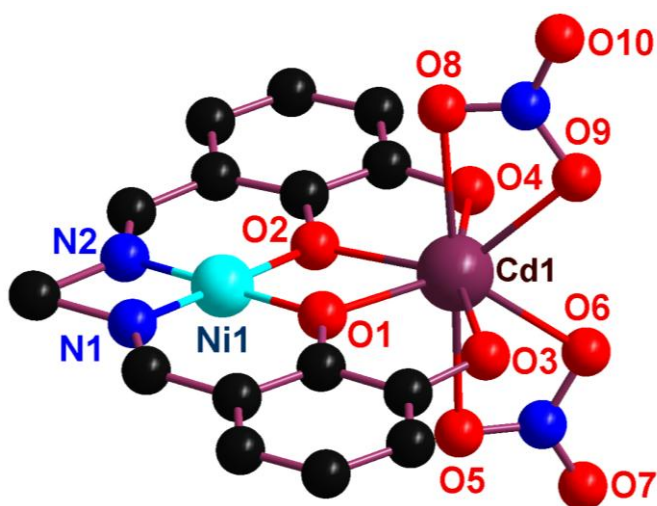

**Fig. S2** Crystal structure of  $[\text{Ni}^{\text{II}}\text{LCd}^{\text{II}}(\text{NO}_3)_2] \cdot \text{CH}_3\text{CN}$  (**8**). Hydrogen atoms are omitted. The acetonitrile molecule of crystallization and the ethoxy carbon atoms are also not shown for clarity.

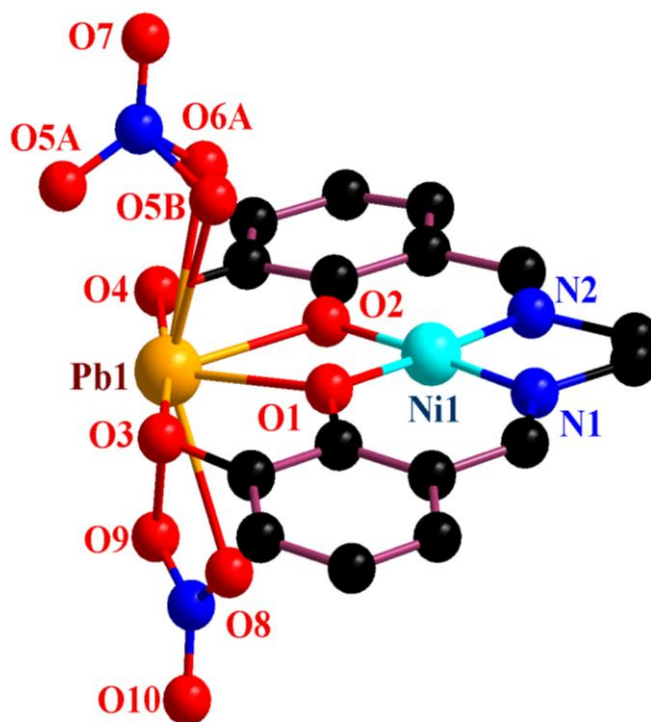

**Fig. S3** Crystal structure of  $[\text{Ni}^{\text{II}}\text{LPb}^{\text{II}}(\text{NO}_3)_2]$  (**9**). Hydrogen atoms and the ethoxy carbon atoms are not shown for clarity. Of the one disordered positions of one oxygen atom of one nitrate anion, one is shown.

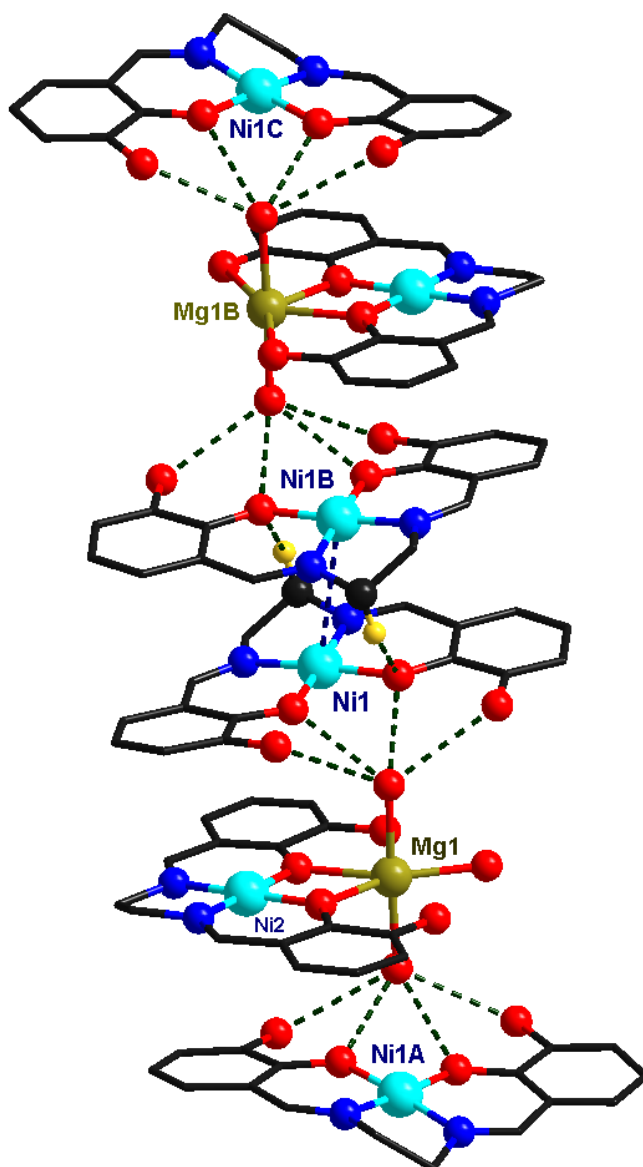

**Fig. S4** Perspective view of  $[\{\text{Ni}^{\text{II}}\text{LMg}^{\text{II}}(\text{H}_2\text{O})_3\}\{\text{Ni}^{\text{II}}\text{L}\}_2](\text{ClO}_4)_2$  (**6**) demonstrating the one-dimensional supramolecular topology generated due to Ni $\cdots$ Ni weak interaction and C–H $\cdots$ O hydrogen bond. Hydrogen atoms, except those participating in hydrogen bonds, are omitted. The perchlorate anion and ethoxy carbon atoms are also not shown for clarity. Symmetry codes: A,  $1-x, y, 0.5-z$ ; B,  $1.5-x, 0.5-y, -z$ ; C,  $0.5+x, 0.5-y, -0.5+z$ .

**Table S1** Bond lengths (Å) and bond angles (°) in the coordination environments of the nickel(II) and lithium(I) centres in **1**

| <b>Bond lengths</b> |           | <b>Bond angles</b> |            |
|---------------------|-----------|--------------------|------------|
| Ni(1)–O(1)          | 1.840(3)  | N(1)–Ni(1)–O(2)    | 178.52(16) |
| Ni(1)–O(2)          | 1.851(3)  | O(1)–Ni(1)–N(2)    | 178.14(16) |
| Ni(1)–N(1)          | 1.847(4)  | N(1)–Ni(1)–O(1)    | 94.41(19)  |
| Ni(1)–N(2)          | 1.836(5)  | N(1)–Ni(1)–N(2)    | 85.9(2)    |
|                     |           | N(2)–Ni(1)–O(2)    | 94.56(19)  |
|                     |           | O(1)–Ni(1)–O(2)    | 85.20(15)  |
| Ni(2)–O(5)          | 1.829(3)  | N(3)–Ni(2)–O(6)    | 177.8(2)   |
| Ni(2)–O(6)          | 1.836(3)  | O(5)–Ni(2)–N(4)    | 177.4(2)   |
| Ni(2)–N(3)          | 1.827(5)  | N(3)–Ni(2)–O(5)    | 95.4(2)    |
| Ni(2)–N(4)          | 1.834(5)  | N(3)–Ni(2)–N(4)    | 87.1(3)    |
|                     |           | N(4)–Ni(2)–O(6)    | 95.0(2)    |
|                     |           | O(5)–Ni(2)–O(6)    | 82.48(15)  |
| Ni(3)–O(11)         | 1.841(3)  | N(5)–Ni(3)–O(12)   | 178.29(17) |
| Ni(3)–O(12)         | 1.839(3)  | O(11)–Ni(3)–N(6)   | 178.99(17) |
| Ni(3)–N(5)          | 1.834(5)  | N(5)–Ni(3)–O(11)   | 94.52(19)  |
| Ni(3)–N(6)          | 1.840(5)  | N(5)–Ni(3)–N(6)    | 85.9(2)    |
|                     |           | N(6)–Ni(3)–O(12)   | 94.8(2)    |
|                     |           | O(11)–Ni(3)–O(12)  | 84.87(16)  |
| Li(1)–O(5)          | 2.024(10) | O(5)–Li(1)–O(6)    | 73.6(3)    |
| Li(1)–O(6)          | 2.008(9)  | O(5)–Li(1)–O(9)    | 104.1(4)   |
| Li(1)–O(9)          | 1.983(9)  | O(5)–Li(1)–O(10)   | 101.6(4)   |
| Li(1)–O(10)         | 1.993(9)  | O(6)–Li(1)–O(9)    | 100.2(4)   |
|                     |           | O(6)–Li(1)–O(10)   | 102.3(4)   |
|                     |           | O(9)–Li(1)–O(10)   | 149.7(5)   |
|                     |           | Ni(2)–O(5)–Li(1)   | 101.7(3)   |
|                     |           | Ni(2)–O(6)–Li(1)   | 102.1(3)   |

**Table S2** Bond lengths (Å) and bond angles (°) in the coordination environments of the nickel(II) and sodium(I) centres in **2**

| Bond lengths |            | Bond angles      |            |
|--------------|------------|------------------|------------|
| Ni(1)–O(1)   | 1.8480(13) | N(1)–Ni(1)–O(2)  | 178.75(7)  |
| Ni(1)–O(2)   | 1.8355(13) | O(1)–Ni(1)–N(2)  | 177.27(7)  |
| Ni(1)–N(1)   | 1.8450(16) | N(1)–Ni(1)–O(1)  | 94.82(7)   |
| Ni(1)–N(2)   | 1.8404(16) | N(1)–Ni(1)–N(2)  | 86.87(8)   |
|              |            | N(2)–Ni(1)–O(2)  | 94.37(7)   |
|              |            | O(1)–Ni(1)–O(2)  | 83.93(5)   |
| Na(1)–O(1)   | 2.3027(14) | O(3)–Na(1)–O(4)  | 166.48(6)  |
| Na(1)–O(2)   | 2.3182(15) | O(1)–Na(1)–O(2)  | 64.42(5)   |
| Na(1)–O(3)   | 2.5610(14) | O(1)–Na(1)–O(3)  | 64.58(5)   |
| Na(1)–O(4)   | 2.5312(15) | O(1)–Na(1)–O(4)  | 128.82(5)  |
| Na(1)–O(5)   | 2.3471(19) | O(1)–Na(1)–O(5)  | 106.28(7)  |
| Na(1)–O(6)   | 2.365(2)   | O(1)–Na(1)–O(6)  | 106.21(9)  |
|              |            | O(2)–Na(1)–O(3)  | 128.99(5)  |
|              |            | O(2)–Na(1)–O(4)  | 64.40(5)   |
|              |            | O(2)–Na(1)–O(5)  | 110.17(7)  |
|              |            | O(2)–Na(1)–O(6)  | 108.58(8)  |
|              |            | O(3)–Na(1)–O(5)  | 85.20(6)   |
|              |            | O(3)–Na(1)–O(6)  | 84.33(6)   |
|              |            | O(4)–Na(1)–O(5)  | 91.52(6)   |
|              |            | O(4)–Na(1)–O(6)  | 89.26(7)   |
|              |            | O(5)–Na(1)–O(6)  | 137.23(10) |
|              |            | Ni(1)–O(1)–Na(1) | 105.89(6)  |
|              |            | Ni(1)–O(2)–Na(1) | 105.71(6)  |

**Table S3** Bond lengths (Å) and bond angles (°) in the coordination environments of the nickel(II) and sodium(I) centres in **3**

| Bond lengths |            | Bond angles      |            |
|--------------|------------|------------------|------------|
| Ni(1)–O(1)   | 1.827(2)   | N(1)–Ni(1)–O(2)  | 175.13(11) |
| Ni(1)–O(2)   | 1.840(2)   | O(1)–Ni(1)–N(2)  | 174.90(12) |
| Ni(1)–N(1)   | 1.844(3)   | N(1)–Ni(1)–O(1)  | 94.40(12)  |
| Ni(1)–N(2)   | 1.840(3)   | N(1)–Ni(1)–N(2)  | 87.07(15)  |
|              |            | N(2)–Ni(1)–O(2)  | 94.47(12)  |
|              |            | O(1)–Ni(1)–O(2)  | 84.47(9)   |
| Ni(2)–O(5)   | 1.838(2)   | N(3)–Ni(2)–O(6)  | 178.32(12) |
| Ni(2)–O(6)   | 1.8346(19) | O(5)–Ni(2)–N(4)  | 178.24(11) |
| Ni(2)–N(3)   | 1.824(3)   | N(3)–Ni(2)–O(5)  | 94.74(12)  |
| Ni(2)–N(4)   | 1.836(3)   | N(3)–Ni(2)–N(4)  | 86.45(13)  |
|              |            | N(4)–Ni(2)–O(6)  | 94.75(11)  |
|              |            | O(5)–Ni(2)–O(6)  | 84.09(9)   |
| Na(1)–O(1)   | 2.409(2)   | O(3)–Na(1)–O(4)  | 170.91(8)  |
| Na(1)–O(2)   | 2.424(2)   | O(7)–Na(1)–O(8)  | 172.42(8)  |
| Na(1)–O(3)   | 2.531(2)   | O(1)–Na(1)–O(2)  | 61.34(7)   |
| Na(1)–O(4)   | 2.580(2)   | O(1)–Na(1)–O(3)  | 63.11(7)   |
| Na(1)–O(5)   | 2.414(2)   | O(1)–Na(1)–O(4)  | 122.28(8)  |
| Na(1)–O(6)   | 2.443(2)   | O(1)–Na(1)–O(5)  | 138.75(8)  |
| Na(1)–O(7)   | 2.505(2)   | O(1)–Na(1)–O(6)  | 136.06(8)  |
| Na(1)–O(8)   | 2.579(2)   | O(1)–Na(1)–O(7)  | 88.78(8)   |
|              |            | O(1)–Na(1)–O(8)  | 89.14(7)   |
|              |            | O(2)–Na(1)–O(3)  | 124.44(8)  |
|              |            | O(2)–Na(1)–O(4)  | 61.60(7)   |
|              |            | O(2)–Na(1)–O(5)  | 139.29(8)  |
|              |            | O(2)–Na(1)–O(6)  | 137.35(8)  |
|              |            | O(2)–Na(1)–O(7)  | 88.20(7)   |
|              |            | O(2)–Na(1)–O(8)  | 84.41(7)   |
|              |            | O(3)–Na(1)–O(5)  | 86.76(8)   |
|              |            | O(3)–Na(1)–O(6)  | 85.47(7)   |
|              |            | O(3)–Na(1)–O(7)  | 91.56(8)   |
|              |            | O(3)–Na(1)–O(8)  | 93.99(7)   |
|              |            | O(4)–Na(1)–O(5)  | 84.83(7)   |
|              |            | O(4)–Na(1)–O(6)  | 93.44(7)   |
|              |            | O(4)–Na(1)–O(7)  | 81.54(8)   |
|              |            | O(4)–Na(1)–O(8)  | 93.43(8)   |
|              |            | O(5)–Na(1)–O(6)  | 60.84(7)   |
|              |            | O(5)–Na(1)–O(7)  | 63.12(7)   |
|              |            | O(5)–Na(1)–O(8)  | 122.31(8)  |
|              |            | O(6)–Na(1)–O(7)  | 123.96(8)  |
|              |            | O(6)–Na(1)–O(8)  | 61.74(7)   |
|              |            | Ni(1)–O(1)–Na(1) | 107.54(9)  |
|              |            | Ni(1)–O(2)–Na(1) | 106.48(9)  |
|              |            | Ni(2)–O(5)–Na(1) | 107.96(9)  |
|              |            | Ni(2)–O(6)–Na(1) | 106.93(9)  |

**Table S4** Bond lengths (Å) and bond angles (°) in the coordination environments of the nickel(II) and rubidium(I) centres in **4**

| Bond lengths |          | Bond angles       |            |
|--------------|----------|-------------------|------------|
| Ni(1)–O(1)   | 1.835(3) | N(1)–Ni(1)–O(2)   | 176.83(12) |
| Ni(1)–O(2)   | 1.839(2) | O(1)–Ni(1)–N(2)   | 176.65(12) |
| Ni(1)–N(1)   | 1.838(3) | N(1)–Ni(1)–O(1)   | 95.04(13)  |
| Ni(1)–N(2)   | 1.847(3) | N(1)–Ni(1)–N(2)   | 86.04(15)  |
|              |          | N(2)–Ni(1)–O(2)   | 94.53(13)  |
|              |          | O(1)–Ni(1)–O(2)   | 84.56(10)  |
| Ni(2)–O(5)   | 1.845(2) | N(3)–Ni(2)–O(6)   | 176.36(13) |
| Ni(2)–O(6)   | 1.829(2) | O(5)–Ni(2)–N(4)   | 176.60(13) |
| Ni(2)–N(3)   | 1.820(3) | N(3)–Ni(2)–O(5)   | 94.88(14)  |
| Ni(2)–N(4)   | 1.849(3) | N(3)–Ni(2)–N(4)   | 86.61(16)  |
|              |          | N(4)–Ni(2)–O(6)   | 94.07(13)  |
|              |          | O(5)–Ni(2)–O(6)   | 84.63(10)  |
| Ni(3)–O(9)   | 1.841(2) | N(5)–Ni(3)–O(10)  | 178.52(11) |
| Ni(3)–O(10)  | 1.830(2) | O(9)–Ni(3)–N(6)   | 177.81(12) |
| Ni(3)–N(5)   | 1.834(3) | N(5)–Ni(3)–O(9)   | 94.68(11)  |
| Ni(3)–N(6)   | 1.834(3) | N(5)–Ni(3)–N(6)   | 87.34(12)  |
|              |          | N(6)–Ni(3)–O(10)  | 94.13(11)  |
|              |          | O(9)–Ni(3)–O(10)  | 83.84(9)   |
| Ni(4)–O(13)  | 1.828(2) | N(7)–Ni(4)–O(14)  | 175.85(12) |
| Ni(4)–O(14)  | 1.838(2) | O(13)–Ni(4)–N(8)  | 176.73(12) |
| Ni(4)–N(7)   | 1.838(3) | N(7)–Ni(4)–O(13)  | 94.84(12)  |
| Ni(4)–N(8)   | 1.833(3) | N(7)–Ni(4)–N(8)   | 86.61(14)  |
|              |          | N(8)–Ni(4)–O(14)  | 94.49(12)  |
|              |          | O(13)–Ni(4)–O(14) | 84.27(9)   |
| Rb(1)–O(1)   | 2.855(2) | O(1)–Rb(1)–O(2)   | 51.10(7)   |
| Rb(1)–O(2)   | 2.875(2) | O(1)–Rb(1)–O(3)   | 51.57(7)   |
| Rb(1)–O(3)   | 3.101(3) | O(1)–Rb(1)–O(4)   | 97.80(7)   |
| Rb(1)–O(4)   | 2.960(3) | O(1)–Rb(1)–O(5)   | 109.59(7)  |
| Rb(1)–O(5)   | 2.833(2) | O(1)–Rb(1)–O(6)   | 77.40(7)   |
| Rb(1)–O(6)   | 2.798(2) | O(1)–Rb(1)–O(7)   | 155.48(7)  |
| Rb(1)–O(7)   | 3.102(3) | O(1)–Rb(1)–O(8)   | 83.81(7)   |
| Rb(1)–O(8)   | 3.064(2) | O(2)–Rb(1)–O(3)   | 94.57(7)   |
|              |          | O(2)–Rb(1)–O(4)   | 52.27(7)   |
|              |          | O(2)–Rb(1)–O(5)   | 158.57(7)  |
|              |          | O(2)–Rb(1)–O(6)   | 109.05(7)  |
|              |          | O(2)–Rb(1)–O(7)   | 150.01(6)  |
|              |          | O(2)–Rb(1)–O(8)   | 74.42(7)   |
|              |          | O(3)–Rb(1)–O(4)   | 114.46(8)  |
|              |          | O(3)–Rb(1)–O(5)   | 74.78(7)   |
|              |          | O(3)–Rb(1)–O(6)   | 83.73(7)   |
|              |          | O(3)–Rb(1)–O(7)   | 104.61(7)  |



|             |          |                   |            |
|-------------|----------|-------------------|------------|
|             |          | O(3)–Rb(1)–O(8)   | 124.61(7)  |
|             |          | O(4)–Rb(1)–O(5)   | 149.10(7)  |
|             |          | O(4)–Rb(1)–O(6)   | 152.90(7)  |
|             |          | O(4)–Rb(1)–O(7)   | 98.28(7)   |
|             |          | O(4)–Rb(1)–O(8)   | 100.93(7)  |
|             |          | O(5)–Rb(1)–O(6)   | 52.12(7)   |
|             |          | O(5)–Rb(1)–O(7)   | 51.26(7)   |
|             |          | O(5)–Rb(1)–O(8)   | 96.09(7)   |
|             |          | O(6)–Rb(1)–O(7)   | 95.98(7)   |
|             |          | O(6)–Rb(1)–O(8)   | 52.25(7)   |
|             |          | O(7)–Rb(1)–O(8)   | 111.02(7)  |
|             |          | Ni(1)–O(1)–Rb(1)  | 104.98(10) |
|             |          | Ni(1)–O(2)–Rb(1)  | 104.14(10) |
|             |          | Ni(2)–O(5)–Rb(1)  | 101.61(10) |
|             |          | Ni(2)–O(6)–Rb(1)  | 103.34(10) |
| Rb(2)–O(9)  | 2.842(2) | O(9)–Rb(2)–O(10)  | 51.10(6)   |
| Rb(2)–O(10) | 2.844(2) | O(9)–Rb(2)–O(11)  | 51.31(6)   |
| Rb(2)–O(11) | 3.134(2) | O(9)–Rb(2)–O(12)  | 95.02(6)   |
| Rb(2)–O(12) | 3.003(2) | O(9)–Rb(2)–O(13)  | 176.55(6)  |
| Rb(2)–O(13) | 2.886(2) | O(9)–Rb(2)–O(14)  | 130.28(6)  |
| Rb(2)–O(14) | 2.772(2) | O(9)–Rb(2)–O(15)  | 127.27(6)  |
| Rb(2)–O(15) | 2.977(2) | O(9)–Rb(2)–O(16)  | 86.76(6)   |
| Rb(2)–O(16) | 2.993(2) | O(10)–Rb(2)–O(11) | 93.86(6)   |
|             |          | O(10)–Rb(2)–O(12) | 51.86(6)   |
|             |          | O(10)–Rb(2)–O(13) | 126.66(6)  |
|             |          | O(10)–Rb(2)–O(14) | 172.31(6)  |
|             |          | O(10)–Rb(2)–O(15) | 82.60(6)   |
|             |          | O(10)–Rb(2)–O(16) | 132.30(6)  |
|             |          | O(11)–Rb(2)–O(12) | 108.20(7)  |
|             |          | O(11)–Rb(2)–O(13) | 128.52(6)  |
|             |          | O(11)–Rb(2)–O(14) | 83.90(6)   |
|             |          | O(11)–Rb(2)–O(15) | 175.00(6)  |
|             |          | O(11)–Rb(2)–O(16) | 68.65(6)   |
|             |          | O(12)–Rb(2)–O(13) | 81.76(6)   |
|             |          | O(12)–Rb(2)–O(14) | 121.90(7)  |
|             |          | O(12)–Rb(2)–O(15) | 66.83(7)   |
|             |          | O(12)–Rb(2)–O(16) | 174.13(7)  |
|             |          | O(13)–Rb(2)–O(14) | 51.48(6)   |
|             |          | O(13)–Rb(2)–O(15) | 52.53(6)   |
|             |          | O(13)–Rb(2)–O(16) | 96.33(6)   |
|             |          | O(14)–Rb(2)–O(15) | 99.15(7)   |
|             |          | O(14)–Rb(2)–O(16) | 53.53(6)   |
|             |          | O(15)–Rb(2)–O(16) | 116.36(7)  |
|             |          | Ni(3)–O(9)–Rb(2)  | 102.51(9)  |
|             |          | Ni(3)–O(10)–Rb(2) | 102.75(9)  |
|             |          | Ni(4)–O(13)–Rb(2) | 103.17(9)  |
|             |          | Ni(4)–O(14)–Rb(2) | 107.20(10) |

---

**Table S5** Bond lengths (Å) and bond angles (°) in the coordination environments of the nickel(II) and cesium(I) centres in **5**

| Bond lengths |          | Bond angles      |            |
|--------------|----------|------------------|------------|
| Ni(1)–O(1)   | 1.853(3) | N(1)–Ni(1)–O(2)  | 176.39(15) |
| Ni(1)–O(2)   | 1.849(3) | O(1)–Ni(1)–N(2)  | 177.04(14) |
| Ni(1)–N(1)   | 1.839(5) | N(1)–Ni(1)–O(1)  | 94.67(19)  |
| Ni(1)–N(2)   | 1.848(5) | N(1)–Ni(1)–N(2)  | 85.7(2)    |
|              |          | N(2)–Ni(1)–O(2)  | 93.95(19)  |
|              |          | O(1)–Ni(1)–O(2)  | 85.91(14)  |
| Ni(2)–O(5)   | 1.855(3) | N(3)–Ni(2)–O(6)  | 177.17(13) |
| Ni(2)–O(6)   | 1.846(3) | O(5)–Ni(2)–N(4)  | 177.14(13) |
| Ni(2)–N(3)   | 1.846(4) | N(3)–Ni(2)–O(5)  | 93.94(15)  |
| Ni(2)–N(4)   | 1.838(4) | N(3)–Ni(2)–N(4)  | 86.53(18)  |
|              |          | N(4)–Ni(2)–O(6)  | 94.39(16)  |
|              |          | O(5)–Ni(2)–O(6)  | 85.28(12)  |
| Cs(1)–O(1)   | 3.021(3) | O(2)–Cs(1)–O(7)  | 163.00(9)  |
| Cs(1)–O(2)   | 2.988(3) | O(4)–Cs(1)–O(5)  | 163.54(9)  |
| Cs(1)–O(3)   | 3.119(3) | O(1)–Cs(1)–O(2)  | 49.64(9)   |
| Cs(1)–O(4)   | 3.170(4) | O(1)–Cs(1)–O(3)  | 50.67(9)   |
| Cs(1)–O(5)   | 3.047(3) | O(1)–Cs(1)–O(4)  | 92.72(9)   |
| Cs(1)–O(6)   | 2.963(3) | O(1)–Cs(1)–O(5)  | 101.79(8)  |
| Cs(1)–O(7)   | 3.180(3) | O(1)–Cs(1)–O(6)  | 71.71(8)   |
| Cs(1)–O(8)   | 3.183(3) | O(1)–Cs(1)–O(7)  | 146.79(9)  |
|              |          | O(1)–Cs(1)–O(8)  | 83.94(9)   |
|              |          | O(2)–Cs(1)–O(3)  | 95.09(9)   |
|              |          | O(2)–Cs(1)–O(4)  | 50.14(10)  |
|              |          | O(2)–Cs(1)–O(5)  | 146.32(8)  |
|              |          | O(2)–Cs(1)–O(6)  | 99.23(8)   |
|              |          | O(2)–Cs(1)–O(8)  | 71.21(9)   |
|              |          | O(3)–Cs(1)–O(5)  | 70.57(8)   |
|              |          | O(3)–Cs(1)–O(4)  | 114.46(10) |
|              |          | O(3)–Cs(1)–O(6)  | 80.00(8)   |
|              |          | O(3)–Cs(1)–O(7)  | 98.48(9)   |
|              |          | O(3)–Cs(1)–O(8)  | 122.46(10) |
|              |          | O(4)–Cs(1)–O(6)  | 145.20(10) |
|              |          | O(4)–Cs(1)–O(7)  | 114.18(10) |
|              |          | O(4)–Cs(1)–O(8)  | 98.74(10)  |
|              |          | O(5)–Cs(1)–O(6)  | 49.29(7)   |
|              |          | O(5)–Cs(1)–O(7)  | 49.55(8)   |
|              |          | O(5)–Cs(1)–O(8)  | 90.56(8)   |
|              |          | O(6)–Cs(1)–O(7)  | 93.19(8)   |
|              |          | O(6)–Cs(1)–O(8)  | 49.94(8)   |
|              |          | O(7)–Cs(1)–O(8)  | 109.24(9)  |
|              |          | Ni(1)–O(1)–Cs(1) | 104.03(13) |
|              |          | Ni(1)–O(2)–Cs(1) | 105.36(13) |
|              |          | Ni(2)–O(5)–Cs(1) | 103.08(11) |
|              |          | Ni(2)–O(6)–Cs(1) | 106.41(11) |

**Table S6** Bond lengths (Å) and bond angles (°) in the coordination environments of the nickel(II) and magnesium(II) centres in **6**

| Bond lengths |          | Bond angles      |            |
|--------------|----------|------------------|------------|
| Ni(1)–O(1)   | 1.855(4) | N(1)–Ni(1)–O(2)  | 176.14(18) |
| Ni(1)–O(2)   | 1.840(3) | O(1)–Ni(1)–N(2)  | 176.29(18) |
| Ni(1)–N(1)   | 1.844(5) | N(1)–Ni(1)–O(1)  | 94.0(2)    |
| Ni(1)–N(2)   | 1.837(5) | N(1)–Ni(1)–N(2)  | 86.1(2)    |
|              |          | N(2)–Ni(1)–O(2)  | 94.74(19)  |
|              |          | O(1)–Ni(1)–O(2)  | 85.40(16)  |
| Ni(2)–N(3)   | 1.828(5) | N(3)–Ni(2)–O(5A) | 177.74(19) |
| Ni(2)–O(5)   | 1.838(4) | N(3)–Ni(2)–O(5)  | 95.38(18)  |
|              |          | N(3)–Ni(2)–N(3A) | 86.7(3)    |
|              |          | O(5)–Ni(2)–O(5A) | 82.6(2)    |
| Mg(1)–O(5)   | 2.191(4) | O(7)–Mg(1)–O(7A) | 178.0(3)   |
| Mg(1)–O(7)   | 2.112(4) | O(5)–Mg(1)–O(7)  | 90.27(15)  |
| Mg(1)–O(8)   | 2.108(9) | O(5)–Mg(1)–O(7A) | 91.39(15)  |
|              |          | O(5)–Mg(1)–O(8)  | 146.40(10) |
|              |          | O(5)–Mg(1)–O(5A) | 67.2(2)    |
|              |          | O(7)–Mg(1)–O(8)  | 89.00(13)  |
|              |          | Ni(2)–O(5)–Mg(1) | 105.13(16) |

**Table S7** Bond lengths (Å) and bond angles (°) in the coordination environments of the nickel(II) and calcium(II) centres in **7**

| Bond lengths |          | Bond angles       |            |
|--------------|----------|-------------------|------------|
| Ni(1)–O(1)   | 1.830(2) | N(1)–Ni(1)–O(2)   | 178.16(13) |
| Ni(1)–O(2)   | 1.844(2) | O(1)–Ni(1)–N(2)   | 178.09(13) |
| Ni(1)–N(1)   | 1.827(3) | N(1)–Ni(1)–O(1)   | 95.70(14)  |
| Ni(1)–N(2)   | 1.825(3) | N(1)–Ni(1)–N(2)   | 85.92(16)  |
|              |          | N(2)–Ni(1)–O(2)   | 95.21(14)  |
|              |          | O(1)–Ni(1)–O(2)   | 83.19(11)  |
| Ca(1)–O(1)   | 2.367(3) | O(1)–Ca(1)–O(2)   | 61.98(8)   |
| Ca(1)–O(2)   | 2.370(2) | O(1)–Ca(1)–O(3)   | 63.71(8)   |
| Ca(1)–O(3)   | 2.502(3) | O(1)–Ca(1)–O(4)   | 125.04(9)  |
| Ca(1)–O(4)   | 2.519(3) | O(1)–Ca(1)–O(5)   | 114.65(10) |
| Ca(1)–O(5)   | 2.578(3) | O(1)–Ca(1)–O(6)   | 80.22(12)  |
| Ca(1)–O(6)   | 2.490(4) | O(1)–Ca(1)–O(8B)  | 78.3(2)    |
| Ca(1)–O(8B)  | 2.690(8) | O(1)–Ca(1)–O(9A)  | 84.1(2)    |
| Ca(1)–O(9A)  | 2.292(9) | O(1)–Ca(1)–O(11)  | 146.89(10) |
| Ca(1)–O(11)  | 2.355(3) | O(2)–Ca(1)–O(3)   | 125.69(8)  |
|              |          | O(2)–Ca(1)–O(4)   | 63.38(8)   |
|              |          | O(2)–Ca(1)–O(5)   | 124.81(9)  |
|              |          | O(2)–Ca(1)–O(6)   | 78.55(10)  |
|              |          | O(2)–Ca(1)–O(8B)  | 101.0(2)   |
|              |          | O(2)–Ca(1)–O(9A)  | 81.0(2)    |
|              |          | O(2)–Ca(1)–O(11)  | 143.66(10) |
|              |          | O(3)–Ca(1)–O(4)   | 169.13(9)  |
|              |          | O(3)–Ca(1)–O(5)   | 78.15(10)  |
|              |          | O(3)–Ca(1)–O(6)   | 91.95(14)  |
|              |          | O(3)–Ca(1)–O(8B)  | 68.31(17)  |
|              |          | O(3)–Ca(1)–O(9A)  | 94.3(3)    |
|              |          | O(3)–Ca(1)–O(11)  | 87.47(10)  |
|              |          | O(4)–Ca(1)–O(5)   | 91.62(10)  |
|              |          | O(4)–Ca(1)–O(6)   | 83.92(14)  |
|              |          | O(4)–Ca(1)–O(8B)  | 117.97(17) |
|              |          | O(4)–Ca(1)–O(9A)  | 93.2(3)    |
|              |          | O(4)–Ca(1)–O(11)  | 85.75(10)  |
|              |          | O(5)–Ca(1)–O(6)   | 48.97(9)   |
|              |          | O(5)–Ca(1)–O(8B)  | 133.6(2)   |
|              |          | O(5)–Ca(1)–O(9A)  | 152.63(18) |
|              |          | O(5)–Ca(1)–O(11)  | 71.37(10)  |
|              |          | O(6)–Ca(1)–O(8B)  | 155.7(2)   |
|              |          | O(6)–Ca(1)–O(9A)  | 158.40(18) |
|              |          | O(6)–Ca(1)–O(11)  | 118.83(11) |
|              |          | O(8B)–Ca(1)–O(9A) | 26.7(3)    |
|              |          | O(8B)–Ca(1)–O(11) | 75.9(2)    |
|              |          | O(9A)–Ca(1)–O(11) | 82.13(19)  |
|              |          | Ni(1)–O(1)–Ca(1)  | 107.69(11) |
|              |          | Ni(1)–O(2)–Ca(1)  | 107.04(10) |

**Table S8** Bond lengths (Å) and bond angles (°) in the coordination environments of the nickel(II) and cadmium(II) centres in **8**

| Bond lengths |          | Bond angles      |            |
|--------------|----------|------------------|------------|
| Ni(1)–O(1)   | 1.836(5) | N(1)–Ni(1)–O(2)  | 177.7(3)   |
| Ni(1)–O(2)   | 1.828(5) | O(1)–Ni(1)–N(2)  | 178.4(3)   |
| Ni(1)–N(1)   | 1.830(7) | N(1)–Ni(1)–O(1)  | 94.7(3)    |
| Ni(1)–N(2)   | 1.828(7) | N(1)–Ni(1)–N(2)  | 86.6(3)    |
|              |          | N(2)–Ni(1)–O(2)  | 95.0(3)    |
|              |          | O(1)–Ni(1)–O(2)  | 83.7(2)    |
| Cd(1)–O(1)   | 2.291(5) | O(5)–Cd(1)–O(8)  | 175.8(2)   |
| Cd(1)–O(2)   | 2.288(5) | O(1)–Cd(1)–O(2)  | 64.54(18)  |
| Cd(1)–O(3)   | 2.524(6) | O(1)–Cd(1)–O(3)  | 64.84(18)  |
| Cd(1)–O(4)   | 2.544(6) | O(1)–Cd(1)–O(4)  | 129.60(18) |
| Cd(1)–O(5)   | 2.445(7) | O(1)–Cd(1)–O(5)  | 88.1(2)    |
| Cd(1)–O(6)   | 2.343(7) | O(1)–Cd(1)–O(6)  | 135.9(2)   |
| Cd(1)–O(8)   | 2.467(7) | O(1)–Cd(1)–O(8)  | 91.0(2)    |
| Cd(1)–O(9)   | 2.357(7) | O(1)–Cd(1)–O(9)  | 123.7(2)   |
|              |          | O(2)–Cd(1)–O(3)  | 129.15(19) |
|              |          | O(2)–Cd(1)–O(4)  | 65.17(18)  |
|              |          | O(2)–Cd(1)–O(5)  | 89.8(2)    |
|              |          | O(2)–Cd(1)–O(6)  | 125.9(2)   |
|              |          | O(2)–Cd(1)–O(8)  | 86.1(2)    |
|              |          | O(2)–Cd(1)–O(9)  | 135.5(2)   |
|              |          | O(3)–Cd(1)–O(4)  | 165.54(18) |
|              |          | O(3)–Cd(1)–O(5)  | 84.0(2)    |
|              |          | O(3)–Cd(1)–O(6)  | 88.8(2)    |
|              |          | O(3)–Cd(1)–O(8)  | 99.3(2)    |
|              |          | O(3)–Cd(1)–O(9)  | 79.2(2)    |
|              |          | O(4)–Cd(1)–O(5)  | 94.9(2)    |
|              |          | O(4)–Cd(1)–O(6)  | 79.2(2)    |
|              |          | O(4)–Cd(1)–O(8)  | 82.5(2)    |
|              |          | O(4)–Cd(1)–O(9)  | 90.8(2)    |
|              |          | O(5)–Cd(1)–O(6)  | 52.8(2)    |
|              |          | O(5)–Cd(1)–O(9)  | 131.0(2)   |
|              |          | O(6)–Cd(1)–O(8)  | 129.4(2)   |
|              |          | O(6)–Cd(1)–O(9)  | 81.0(3)    |
|              |          | O(8)–Cd(1)–O(9)  | 52.5(2)    |
|              |          | Ni(1)–O(1)–Cd(1) | 105.7(2)   |
|              |          | Ni(1)–O(2)–Cd(1) | 106.1(2)   |

**Table S9** Bond lengths (Å) and bond angles (°) in the coordination environments of the nickel(II) and lead(II) centres in **9**

| Bond lengths |           | Bond angles       |            |
|--------------|-----------|-------------------|------------|
| Ni(1)–O(1)   | 1.859(4)  | N(1)–Ni(1)–O(2)   | 177.0(3)   |
| Ni(1)–O(2)   | 1.862(5)  | O(1)–Ni(1)–N(2)   | 177.3(3)   |
| Ni(1)–N(1)   | 1.833(6)  | N(1)–Ni(1)–O(1)   | 95.0(3)    |
| Ni(1)–N(2)   | 1.826(6)  | N(1)–Ni(1)–N(2)   | 85.3(3)    |
|              |           | N(2)–Ni(1)–O(2)   | 94.8(3)    |
|              |           | O(1)–Ni(1)–O(2)   | 85.1(2)    |
| Pb(1)–O(1)   | 2.478(5)  | O(3)–Pb(1)–O(4)   | 174.09(19) |
| Pb(1)–O(2)   | 2.448(5)  | O(1)–Pb(1)–O(2)   | 61.42(14)  |
| Pb(1)–O(3)   | 2.699(5)  | O(1)–Pb(1)–O(3)   | 61.22(16)  |
| Pb(1)–O(4)   | 2.684(6)  | O(1)–Pb(1)–O(4)   | 123.02(16) |
| Pb(1)–O(5A)  | 2.940(12) | O(1)–Pb(1)–O(5A)  | 105.8(3)   |
| Pb(1)–O(6A)  | 2.640(16) | O(1)–Pb(1)–O(6A)  | 80.5(4)    |
| Pb(1)–O(8)   | 2.631(6)  | O(1)–Pb(1)–O(8)   | 69.61(18)  |
| Pb(1)–O(9)   | 2.763(8)  | O(1)–Pb(1)–O(9)   | 108.7(2)   |
|              |           | O(2)–Pb(1)–O(3)   | 122.61(16) |
|              |           | O(2)–Pb(1)–O(4)   | 61.66(15)  |
|              |           | O(2)–Pb(1)–O(5A)  | 113.1(3)   |
|              |           | O(2)–Pb(1)–O(6A)  | 72.3(4)    |
|              |           | O(2)–Pb(1)–O(8)   | 88.79(19)  |
|              |           | O(2)–Pb(1)–O(9)   | 86.3(2)    |
|              |           | O(3)–Pb(1)–O(5A)  | 80.9(3)    |
|              |           | O(3)–Pb(1)–O(6A)  | 96.8(4)    |
|              |           | O(3)–Pb(1)–O(8)   | 73.4(2)    |
|              |           | O(3)–Pb(1)–O(9)   | 113.5(2)   |
|              |           | O(4)–Pb(1)–O(5A)  | 93.6(3)    |
|              |           | O(4)–Pb(1)–O(6A)  | 80.5(4)    |
|              |           | O(4)–Pb(1)–O(8)   | 111.6(2)   |
|              |           | O(4)–Pb(1)–O(9)   | 69.92      |
|              |           | O(5A)–Pb(1)–O(6A) | 41.5(4)    |
|              |           | O(5A)–Pb(1)–O(8)  | 152.8(3)   |
|              |           | O(5A)–Pb(1)–O(9)  | 145.4(3)   |
|              |           | O(6A)–Pb(1)–O(8)  | 149.7(4)   |
|              |           | O(6A)–Pb(1)–O(9)  | 149.3(4)   |
|              |           | O(8)–Pb(1)–O(9)   | 46.3(2)    |
|              |           | Ni(1)–O(1)–Pb(1)  | 106.0(2)   |
|              |           | Ni(1)–O(2)–Pb(1)  | 107.13(19) |

**Table S10** Bond lengths (Å) and bond angles (°) in the coordination environments of the nickel(II) centres in **10**

| <b>Bond lengths</b> |            | <b>Bond angles</b> |           |
|---------------------|------------|--------------------|-----------|
| Ni(1)–O(1)          | 1.8404(13) | O(1)–Ni(1)–N(2)    | 177.31(6) |
| Ni(1)–O(2)          | 1.8443(14) | O(2)–Ni(1)–N(1)    | 177.31(6) |
| Ni(1)–N(1)          | 1.8447(17) | O(1)–Ni(1)–O(2)    | 84.86(6)  |
| Ni(1)–N(2)          | 1.8478(16) | O(1)–Ni(1)–N(1)    | 94.23(7)  |
|                     |            | O(2)–Ni(1)–N(2)    | 94.48(7)  |
|                     |            | N(1)–Ni(1)–N(2)    | 86.55(8)  |
| Ni(2)–O(5)          | 1.8331(14) | O(5)–Ni(2)–N(4)    | 177.00(8) |
| Ni(2)–O(6)          | 1.8409(13) | O(6)–Ni(2)–N(3)    | 178.13(8) |
| Ni(2)–N(3)          | 1.8390(19) | O(5)–Ni(2)–O(6)    | 84.79(6)  |
| Ni(2)–N(4)          | 1.839(2)   | O(5)–Ni(2)–N(3)    | 94.25(8)  |
|                     |            | O(6)–Ni(2)–N(4)    | 94.11(8)  |
|                     |            | N(3)–Ni(2)–N(4)    | 86.93(10) |
